# Supplementary material for: A few Ascomycota taxa dominate soil fungal communities worldwide
Source: PubMed Central journal article supplement (PMC6542806; doi:10.1038/s41467-019-10373-z), 2019-05-30
Supplement: 41467_2019_10373_MOESM1_ESM.pdf [file 41467_2019_10373_MOESM1_ESM.pdf]

## **Supplementary Information**

Egidi et al. *A few Ascomycota taxa dominate soil fungal communities worldwide*

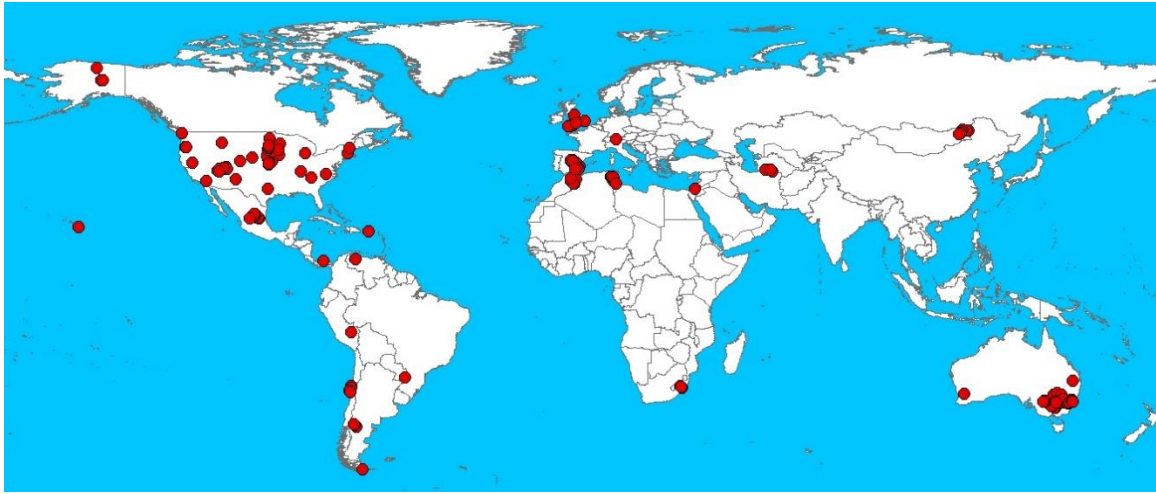

Supplementary Figure 1. Location of the sites surveyed in this study.

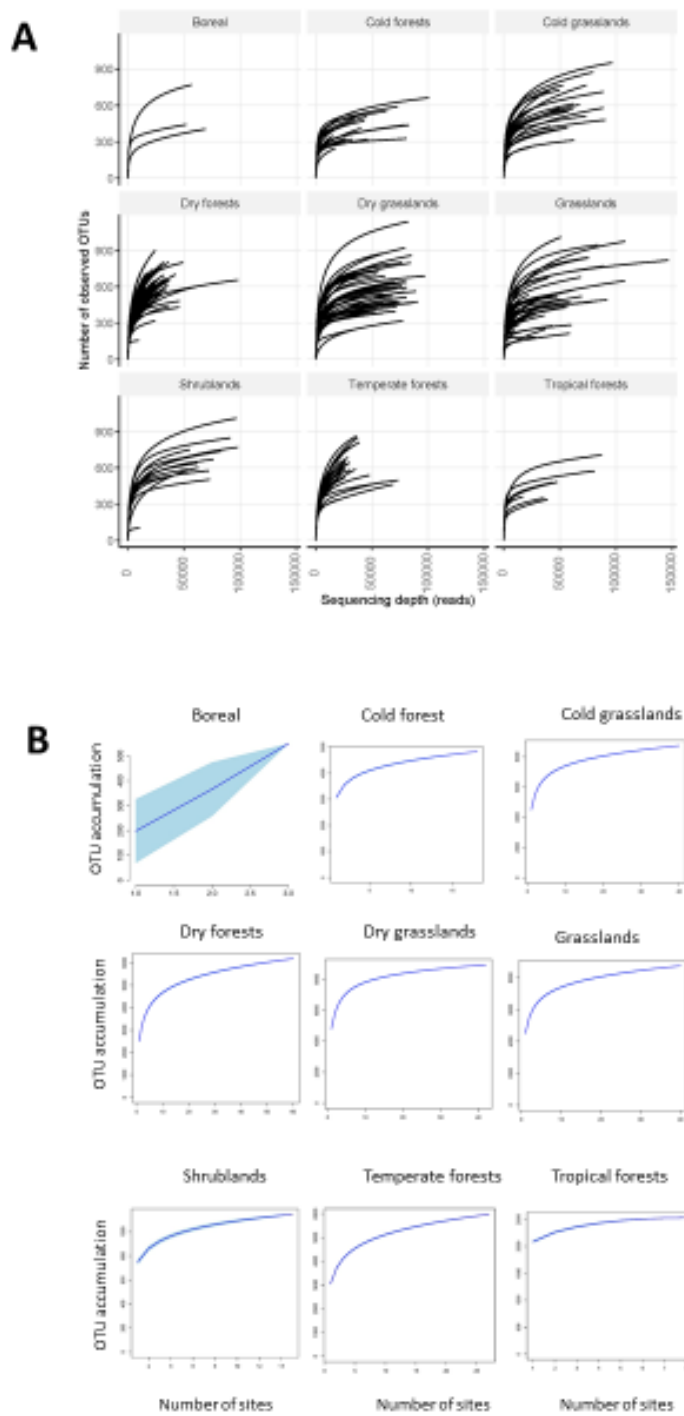

Supplementary Figure 2. Rarefaction (A) and species accumulation (B) curves for the samples analysed in this study. The rarefaction curves were obtained using the `amp_rarecurve` function in the package `ampvis2` (<https://madsalbertsen.github.io/ampvis2/index.html>), while the species accumulation curves were obtained using the `specaccum` function (method="rarefaction") in the package `vegan`<sup>1</sup>. Shaded areas indicated 95% confidence intervals.

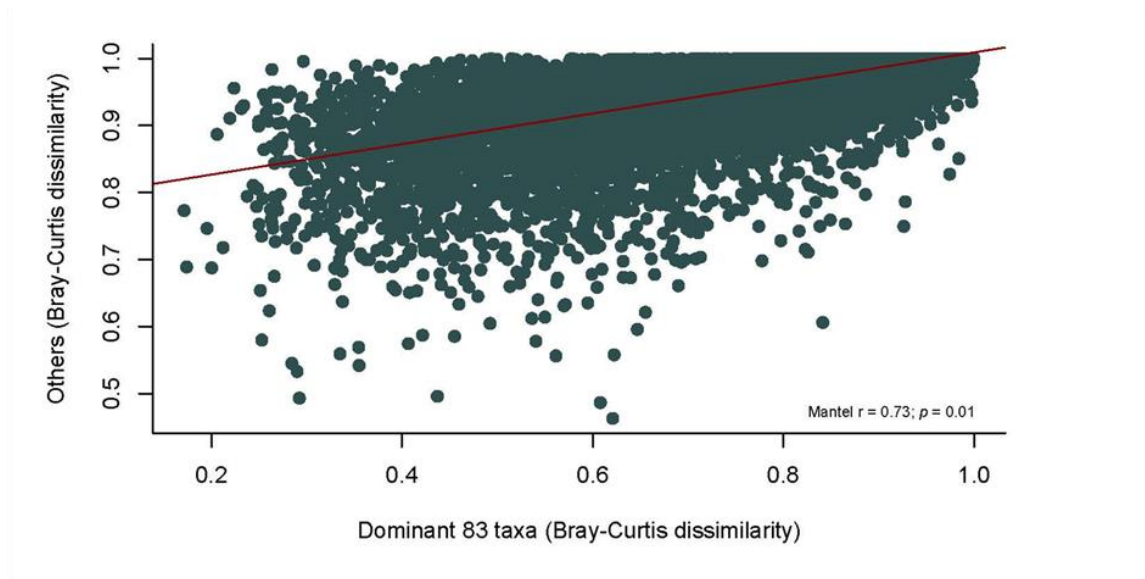

Supplementary Figure 3. Relationship between beta diversity (community dissimilarity) based on Bray-Curtis distance for the dominant (84 phylotypes) and the remaining 24,053 fungal phylotypes.

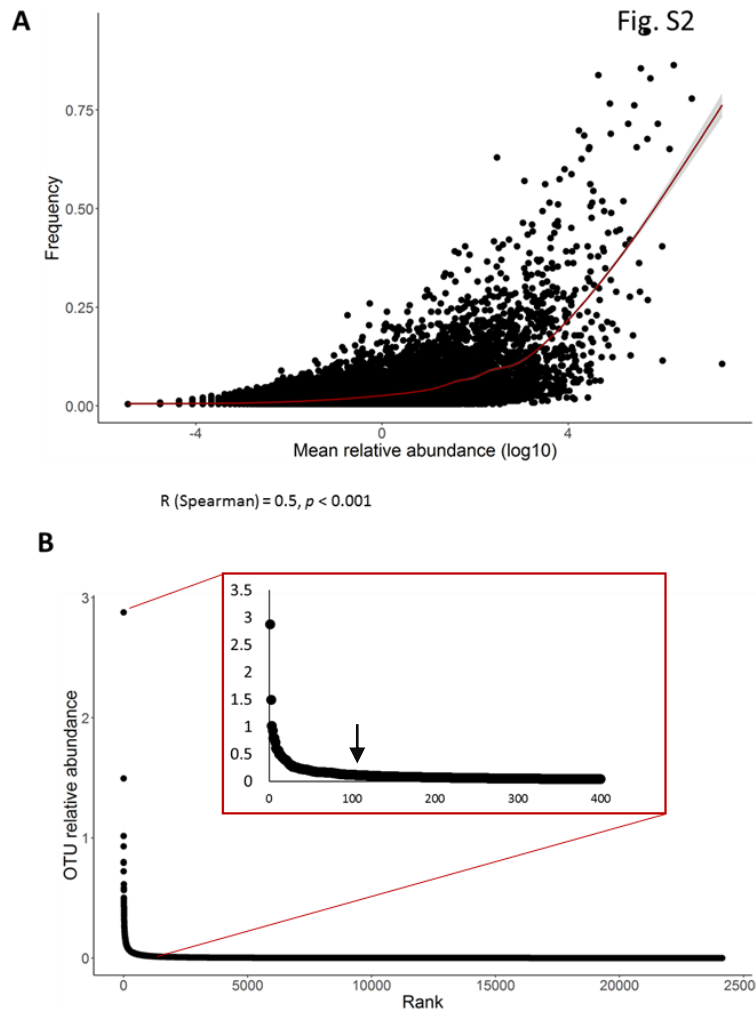

Supplementary Figure 4. Relationship between phylotype relative abundance and number of sites occupied (A) and rank abundance curve for fungal ITS sequence data, with the phylotypes ordered on the x-axis from most to least abundant (B). A close up of the top 400 taxa is shown in the inset. Only 130 OTUs had relative abundance  $>0.1\%$  (indicated by an arrow in the inset).

**A**

Fungal Phyla (relative proportion)

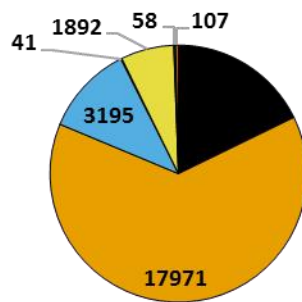**B**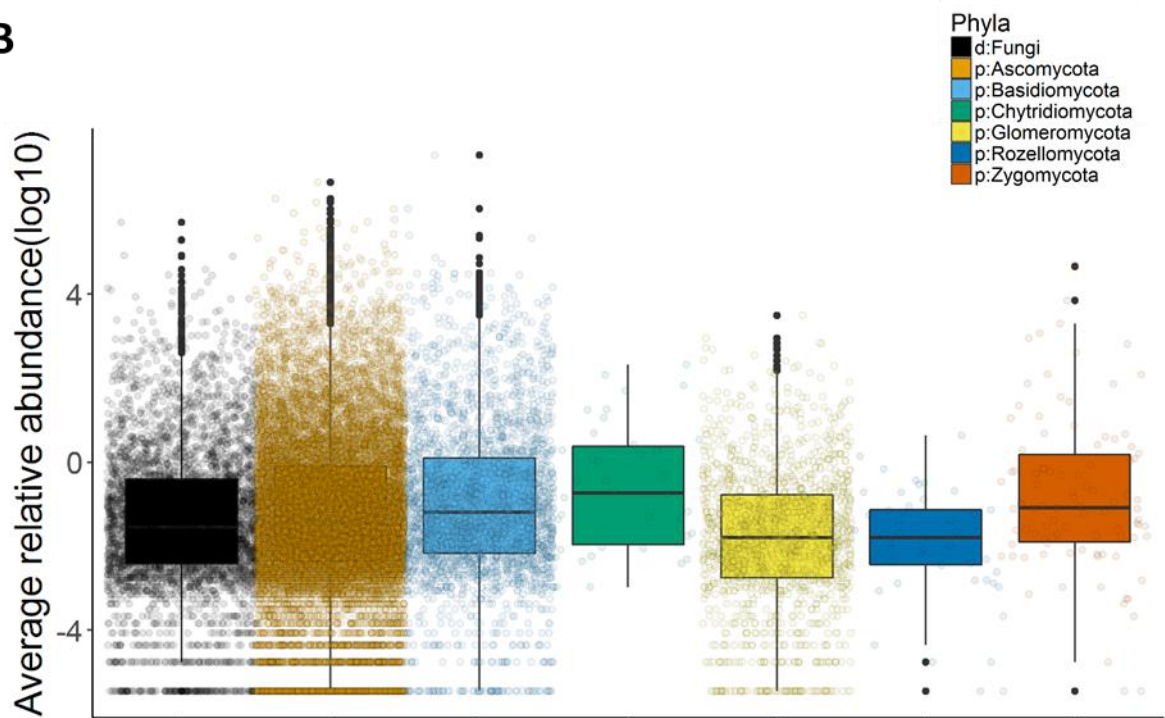

Supplementary Figure 5. (A) Pie chart indicating the relative abundance of the main fungal phyla retrieved at the global level. The number of phylotypes are reported for each phylum. (B) Boxplot comparing the average relative abundance (logarithmic scale) of each phylum.

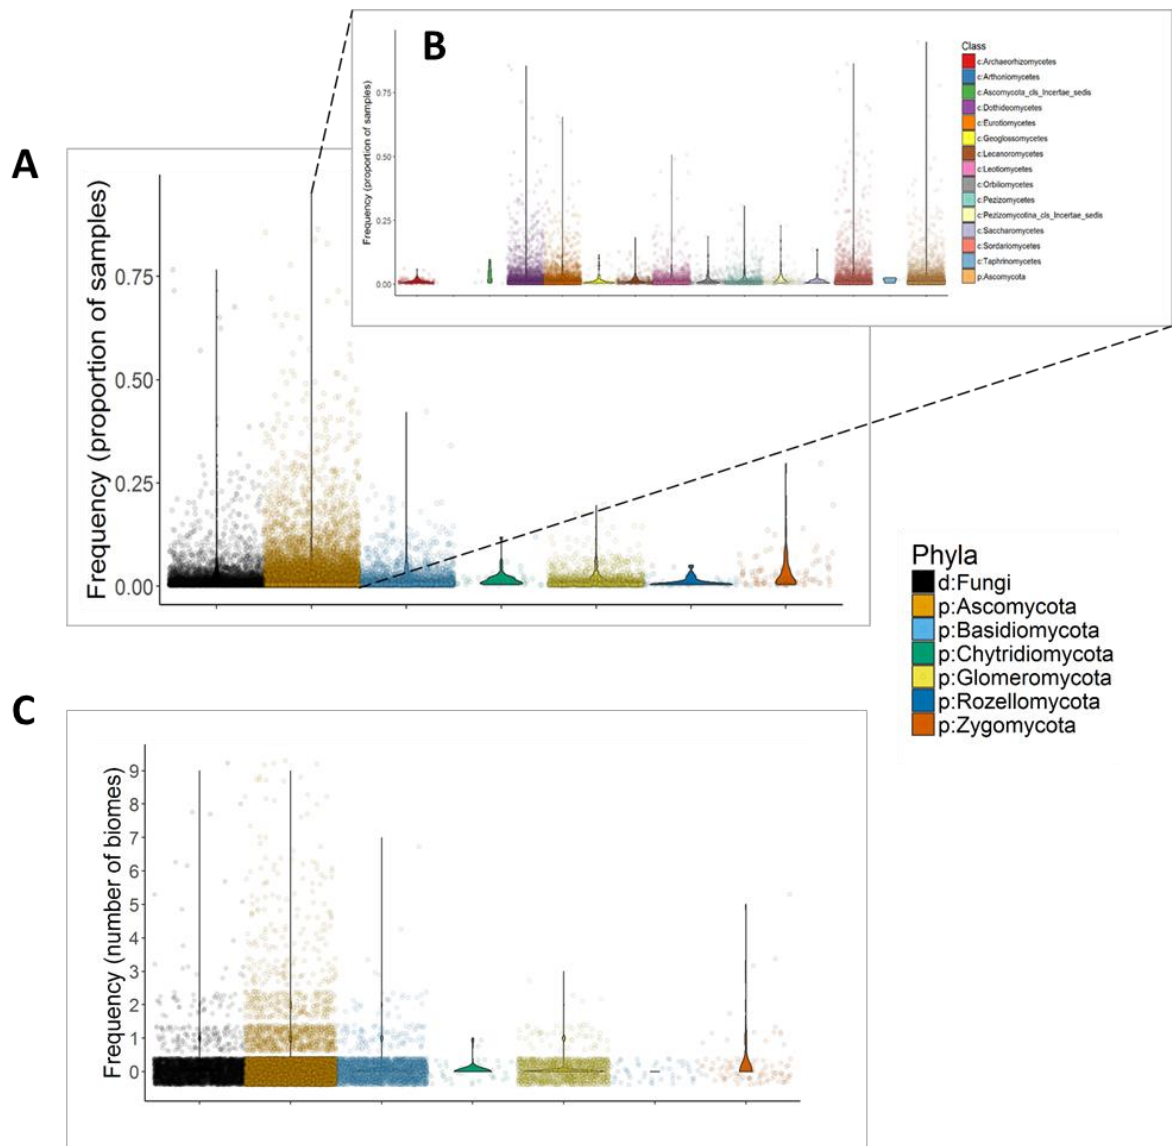

Supplementary Figure 6. Violin plots showing the number of samples in which each phylotype was observed, grouped by phylum (A), the number of samples in which each phylotype assigned to the phylum Ascomycota was observed, grouped by class (B) and the number of biomes in which each phylotype was found to be dominant (i.e., occurring in at least 30% of the samples from a given biome), grouped by phylum (C).

### A Primary and Secondary Metabolism

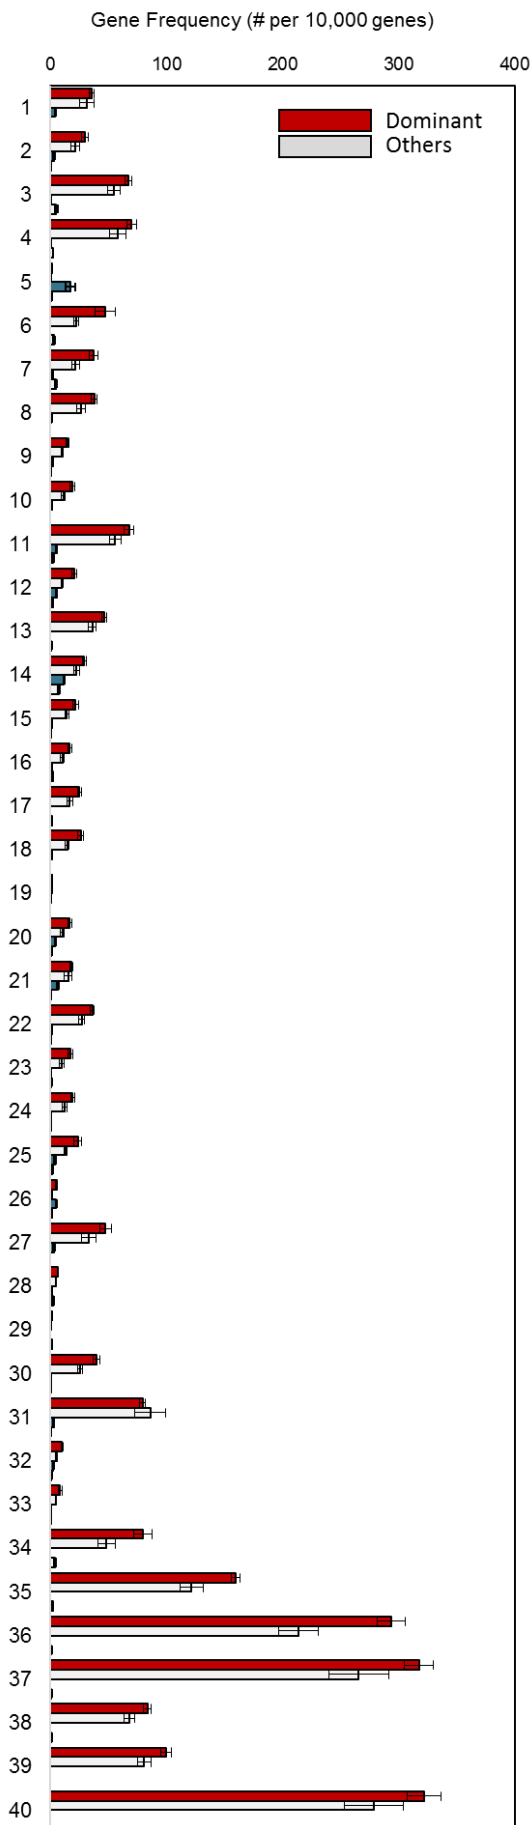

### B Others

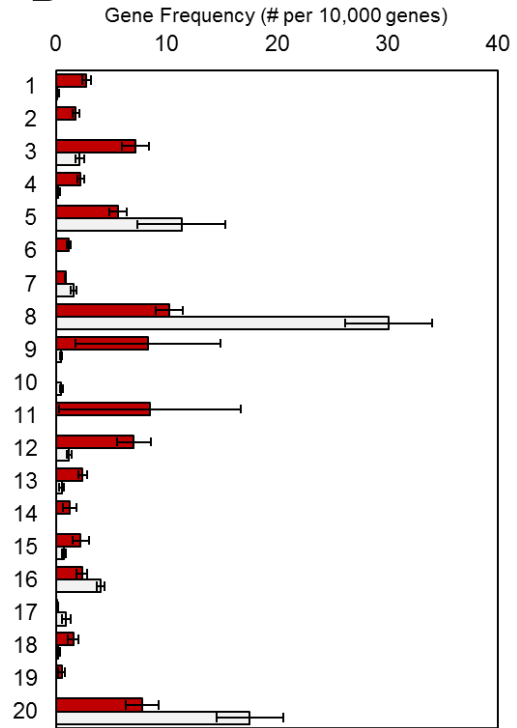

### C CAZymes

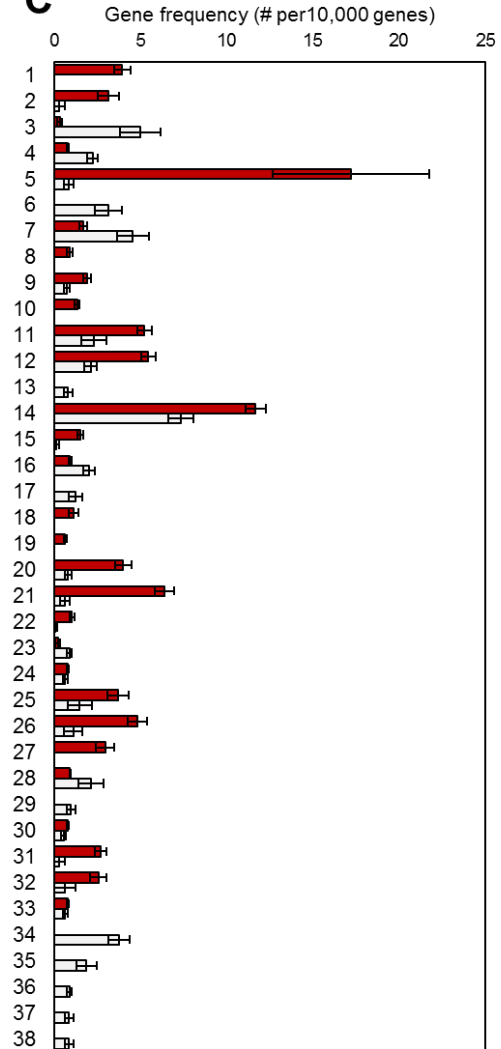



Dominant Ascomycota/Non-Dominant Basidiomycota

| Fig. | #  | Classification | ID                                           | Function                                                        | Mean Decrease Accuracy | p value | p.value (one-way anova) |
|------|----|----------------|----------------------------------------------|-----------------------------------------------------------------|------------------------|---------|-------------------------|
| A    | 1  | KEGG           |                                              | Anthocyanin biosynthesis                                        | 2.34                   | 0.04    | *                       |
|      | 2  | KEGG           |                                              | Betalain biosynthesis                                           | 2.43                   | 0.03    | *                       |
|      | 3  | KEGG           |                                              | Biosynthesis of alkaloids derived from terpenoid and polyketide | 2.73                   | 0.03    | *                       |
|      | 4  | KEGG           |                                              | Biosynthesis of unsaturated fatty acids                         | 3.41                   | 0.02    | *                       |
|      | 5  | KEGG           |                                              | Biosynthesis of vancomycin group antibiotics                    | 3.06                   | 0.02    | *                       |
|      | 6  | KEGG           |                                              | Caprolactam degradation                                         | 2.36                   | 0.04    | *                       |
|      | 7  | KEGG           |                                              | Cyanoamino acid metabolism                                      | 4.07                   | 0.01    | *                       |
|      | 8  | KEGG           |                                              | Fatty acid biosynthesis                                         | 3.44                   | 0.02    | *                       |
|      | 9  | KEGG           |                                              | Fatty acid elongation in mitochondria                           | 4.39                   | 0.01    | *                       |
|      | 10 | KEGG           |                                              | Flavone and flavonol biosynthesis                               | 2.17                   | 0.04    | *                       |
|      | 11 | KEGG           |                                              | Fructose and mannose metabolism                                 | 3.96                   | 0       | *                       |
|      | 12 | KEGG           |                                              | Geraniol degradation                                            | 2.69                   | 0.03    | *                       |
|      | 13 | KEGG           |                                              | Glycerophospholipid metabolism                                  | 2.56                   | 0.03    | *                       |
|      | 14 | KEGG           |                                              | Glycosphingolipid biosynthesis ganglio series                   | 2.48                   | 0.03    | *                       |
|      | 15 | KEGG           |                                              | Glycosphingolipid biosynthesis globoseries                      | 5                      | 0       | *                       |
|      | 16 | KEGG           |                                              | Glycosphingolipid biosynthesis lacto and neolacto series        | 4.26                   | 0.01    | *                       |
|      | 17 | KEGG           |                                              | Glycosylphosphatidylinositol GPI anchor biosynthesis            | 2.85                   | 0.02    | *                       |
|      | 18 | KEGG           |                                              | High mannose type N glycan biosynthesis                         | 2.49                   | 0.03    | *                       |
|      | 19 | KEGG           |                                              | Indole alkaloid biosynthesis                                    | 5.76                   | 0       | *                       |
|      | 20 | KEGG           |                                              | Keratan sulfate biosynthesis                                    | 2.75                   | 0.02    | *                       |
|      | 21 | KEGG           |                                              | Methane metabolism                                              | 3.41                   | 0.02    | *                       |
|      | 22 | KEGG           |                                              | N Glycan biosynthesis                                           | 4.54                   | 0.01    | *                       |
|      | 23 | KEGG           |                                              | O Glycan biosynthesis                                           | 4.81                   | 0       | *                       |
|      | 24 | KEGG           |                                              | O Mannosyl glycan biosynthesis                                  | 3.78                   | 0.01    | *                       |
|      | 25 | KEGG           |                                              | Pantothenate and CoA biosynthesis                               | 5.87                   | 0       | *                       |
|      | 26 | KEGG           |                                              | Penicillin and cephalosporin biosynthesis                       | 2.52                   | 0.02    | *                       |
|      | 27 | KEGG           |                                              | Phenylalanine metabolism                                        | 2.81                   | 0.03    | *                       |
|      | 28 | KEGG           |                                              | Phosphonate and phosphinate metabolism                          | 5.07                   | 0       | *                       |
|      | 29 | KEGG           |                                              | Polyketide sugar unit biosynthesis                              | 5.28                   | 0.01    | *                       |
|      | 30 | KEGG           |                                              | Propanoate metabolism                                           | 2.24                   | 0.04    | *                       |
|      | 31 | KEGG           |                                              | Sphingolipid metabolism                                         | 3.91                   | 0.01    | *                       |
|      | 32 | KEGG           |                                              | Streptomycin biosynthesis                                       | 5.2                    | 0.01    | *                       |
|      | 33 | KEGG           |                                              | Synthesis and degradation of ketone bodies                      | 2.32                   | 0.05    | *                       |
|      | 34 | KEGG           |                                              | Tyrosine metabolism                                             | 4.63                   | 0       | *                       |
|      | 35 | KOG            |                                              | Inorganic ion transport and metabolism                          | 12.81                  | 0       | *                       |
|      | 36 | KOG            |                                              | Amino acid transport and metabolism                             | 12.47                  | 0       | *                       |
|      | 37 | KOG            |                                              | Carbohydrate transport and metabolism                           | 8.25                   | 0.01    | *                       |
|      | 38 | KOG            |                                              | Nucleotide transport and metabolism                             | 6                      | 0.02    | *                       |
|      | 39 | KOG            |                                              | Coenzyme transport and metabolism                               | 5.9                    | 0.03    | *                       |
|      | 40 | KOG            |                                              | Energy production and conversion                                | 5.41                   | 0.03    | *                       |
| B    | 1  | Nutrients      | <i>Phosphate transporter/IPR001204</i>       | P immobilization                                                | 23.11                  | 0       | *                       |
|      | 2  | Nutrients      | <i>Amino acid permease/IPR004762</i>         | N immobilization                                                | 21.72                  | 0       | *                       |
|      | 3  | SM             | <i>PKS</i>                                   | Stress resistance                                               | 19.42                  | 0       | *                       |
|      | 4  | SM             | <i>PKS-LIKE</i>                              | Stress resistance                                               | 15.46                  | 0       | *                       |
|      | 5  | SM             | <i>MRPS-LIKE</i>                             | Stress resistance                                               | 10.23                  | 0.02    | *                       |
|      | 6  | Stress         | <i>β1,3-glucan synthase/GO0006582</i>        | C deposition                                                    | 27.94                  | 0       | *                       |
|      | 7  | Stress         | <i>Melanin/GO 0000148</i>                    | C deposition                                                    | 19.09                  | 0.01    | *                       |
|      | 8  | MEROPS         | <i>AA</i>                                    | Peptidase                                                       | 10.84                  | 0       | *                       |
|      | 9  | MEROPS         | <i>JC</i>                                    | Peptidase                                                       | 9.36                   | 0       | *                       |
|      | 10 | MEROPS         | <i>MM</i>                                    | Peptidase                                                       | 6.14                   | 0       | *                       |
|      | 11 | MEROPS         | <i>AF</i>                                    | Peptidase                                                       | 2.57                   | 0       | *                       |
|      | 12 | MEROPS         | <i>AD</i>                                    | Peptidase                                                       | 7.8                    | 0       | *                       |
|      | 13 | MEROPS         | <i>MC</i>                                    | Peptidase                                                       | 7.31                   | 0.01    | *                       |
|      | 14 | MEROPS         | <i>AC</i>                                    | Peptidase                                                       | 5.63                   | 0.01    | *                       |
|      | 15 | MEROPS         | <i>ME</i>                                    | Peptidase                                                       | 6.38                   | 0.02    | *                       |
|      | 16 | MEROPS         | <i>MP</i>                                    | Peptidase                                                       | 7.12                   | 0.02    | *                       |
|      | 17 | MEROPS         | <i>MF</i>                                    | Peptidase                                                       | 4.52                   | 0.03    | *                       |
|      | 18 | MEROPS         | <i>MERCO:US2 UPW</i>                         | Peptidase                                                       | 4.19                   | 0.04    | *                       |
|      | 19 | MEROPS         | <i>CO</i>                                    | Peptidase                                                       | 2.54                   | 0.05    | *                       |
|      | 20 | MEROPS         | <i>MERCO:C108 00</i>                         | Peptidase                                                       | 3                      | 0.05    | *                       |
| C    | 1  | CAZy           | <i>Auxiliary Activity Family 1 Subf 3</i>    | Stimulation of lignocellulose degradation                       | 6.27                   | 0       | *                       |
|      | 2  | CAZy           | <i>Auxiliary Activity Family 11</i>          | Stimulation of lignocellulose degradation                       | 3.88                   | 0.01    | *                       |
|      | 3  | CAZy           | <i>Auxiliary Activity Family 5 Subf 1</i>    | Stimulation of lignocellulose degradation                       | 5.14                   | 0       | *                       |
|      | 4  | CAZy           | <i>Auxiliary Activity Family 6</i>           | Stimulation of lignocellulose degradation                       | 4.15                   | 0       | *                       |
|      | 5  | CAZy           | <i>Carbohydrate Binding Module Family 18</i> | Catalytic efficiency enhancing                                  | 3.54                   | 0.02    | *                       |
|      | 6  | CAZy           | <i>Carbohydrate Binding Module Family 5</i>  | Catalytic efficiency enhancing                                  | 3.63                   | 0       | *                       |
|      | 7  | CAZy           | <i>Carbohydrate Esterase Family 16</i>       |                                                                 | 2.78                   | 0.04    | *                       |
|      | 8  | CAZy           | <i>Glycoside Hydrolase Family 114</i>        | Degradation of complex sugars                                   | 2.42                   | 0.03    | *                       |
|      | 9  | CAZy           | <i>Glycoside Hydrolase Family 125</i>        | Degradation of complex sugars                                   | 3.56                   | 0.01    | *                       |
|      | 10 | CAZy           | <i>Glycoside Hydrolase Family 132</i>        | Degradation of complex sugars                                   | 6.97                   | 0       | *                       |
|      | 11 | CAZy           | <i>Glycoside Hydrolase Family 17</i>         | Degradation of complex sugars                                   | 3.77                   | 0.01    | *                       |
|      | 12 | CAZy           | <i>Glycoside Hydrolase Family 2</i>          | Degradation of complex sugars                                   | 2.51                   | 0.04    | *                       |
|      | 13 | CAZy           | <i>Glycoside Hydrolase Family 23</i>         | Degradation of complex sugars                                   | 4.12                   | 0       | *                       |
|      | 14 | CAZy           | <i>Glycoside Hydrolase Family 3</i>          | Degradation of complex sugars                                   | 2.3                    | 0.05    | *                       |
|      | 15 | CAZy           | <i>Glycoside Hydrolase Family 36</i>         | Degradation of complex sugars                                   | 3.72                   | 0.01    | *                       |
|      | 16 | CAZy           | <i>Glycoside Hydrolase Family 5 Subf 12</i>  | Degradation of complex sugars                                   | 2.76                   | 0.04    | *                       |
|      | 17 | CAZy           | <i>Glycoside Hydrolase Family 5 Subf 50</i>  | Degradation of complex sugars                                   | 3.5                    | 0       | *                       |
|      | 18 | CAZy           | <i>Glycoside Hydrolase Family 64</i>         | Degradation of complex sugars                                   | 3.12                   | 0.01    | *                       |
|      | 19 | CAZy           | <i>Glycoside Hydrolase Family 67</i>         | Degradation of complex sugars                                   | 2.9                    | 0.01    | *                       |
|      | 20 | CAZy           | <i>Glycoside Hydrolase Family 72</i>         | Degradation of complex sugars                                   | 3.47                   | 0.01    | *                       |
|      | 21 | CAZy           | <i>Glycoside Hydrolase Family 76</i>         | Degradation of complex sugars                                   | 5.46                   | 0       | *                       |
|      | 22 | CAZy           | <i>Glycoside Hydrolase Family 81</i>         | Degradation of complex sugars                                   | 5.09                   | 0       | *                       |
|      | 23 | CAZy           | <i>Glycoside Hydrolase Family 85</i>         | Degradation of complex sugars                                   | 2.32                   | 0.05    | *                       |
|      | 24 | CAZy           | <i>Glycosyl Transferase Family 21</i>        | Fungal polysaccharide synthesis                                 | 2.9                    | 0.02    | *                       |
|      | 25 | CAZy           | <i>Glycosyl Transferase Family 31</i>        | Fungal polysaccharide synthesis                                 | 2.47                   | 0.03    | *                       |
|      | 26 | CAZy           | <i>Glycosyl Transferase Family 32</i>        | Fungal polysaccharide synthesis                                 | 2.79                   | 0.04    | *                       |
|      | 27 | CAZy           | <i>Glycosyl Transferase Family 34</i>        | Fungal polysaccharide synthesis                                 | 5.58                   | 0       | *                       |
|      | 28 | CAZy           | <i>Glycosyl Transferase Family 48</i>        | Fungal polysaccharide synthesis                                 | 4.24                   | 0       | *                       |
|      | 29 | CAZy           | <i>Glycosyl Transferase Family 49</i>        | Fungal polysaccharide synthesis                                 | 3.44                   | 0.01    | *                       |
|      | 30 | CAZy           | <i>Glycosyl Transferase Family 50</i>        | Fungal polysaccharide synthesis                                 | 2.19                   | 0.05    | *                       |
|      | 31 | CAZy           | <i>Glycosyl Transferase Family 62</i>        | Fungal polysaccharide synthesis                                 | 3.87                   | 0       | *                       |
|      | 32 | CAZy           | <i>Glycosyl Transferase Family 71</i>        | Fungal polysaccharide synthesis                                 | 3.71                   | 0.01    | *                       |
|      | 33 | CAZy           | <i>Glycosyl Transferase Family 76</i>        | Fungal polysaccharide synthesis                                 | 2.37                   | 0.03    | *                       |
|      | 34 | CAZy           | <i>Polysaccharide Lyase Family 14</i>        | Degradation of Polysaccharide                                   | 5.95                   | 0       | *                       |
|      | 35 | CAZy           | <i>Polysaccharide Lyase Family 14 Subf 4</i> | Degradation of Polysaccharide                                   | 3.74                   | 0       | *                       |
|      | 36 | CAZy           | <i>Polysaccharide Lyase Family 14 Subf 5</i> | Degradation of Polysaccharide                                   | 6.43                   | 0       | *                       |
|      | 37 | CAZy           | <i>Polysaccharide Lyase Family 8</i>         | Degradation of Polysaccharide                                   | 2.36                   | 0.02    | *                       |
|      | 38 | CAZy           | <i>Polysaccharide Lyase Family 8 Subf 4</i>  | Degradation of Polysaccharide                                   | 1.99                   | 0.03    | *                       |

Supplementary Figure 7. Frequencies of genes selected from Random Forest (RF) analyses of genomes matching dominant Ascomycota phylotypes (n=13) and genomes representing phylotypes assigned to the non-dominant Basidiomycota (n=9). The asterisk highlights those genes that were significantly different in relative frequency (average  $\pm$  SE), calculated by one-way anova,  $p < 0.05$ .

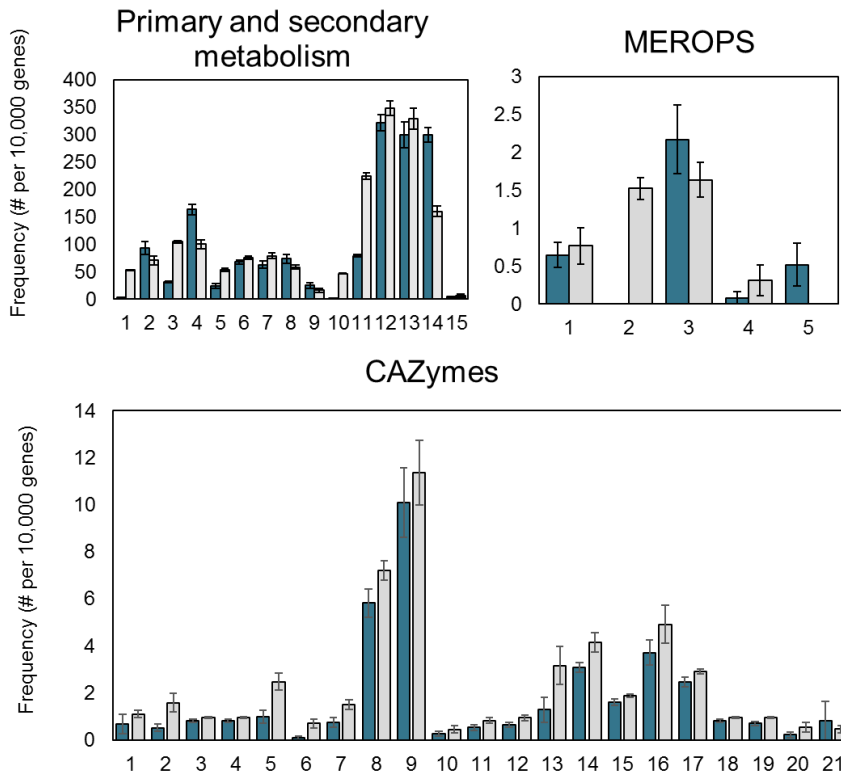

Dominant Ascomycota/Not Dominant Ascomycota

| Fig. | #    | Classification                              | ID                                           | Function                                                    | Mean Decrease Accuracy | p value | p value (one-way anova) |
|------|------|---------------------------------------------|----------------------------------------------|-------------------------------------------------------------|------------------------|---------|-------------------------|
| A    | 1    | KEGG                                        | <i>Phosphate transporter/PR001204</i>        | Phosphate transporter                                       | 11.76                  | 0.03    | *                       |
|      | 2    | KEGG                                        |                                              | Benzoate degradation via CoA ligation                       | 2.77                   | 0.03    |                         |
|      | 3    | KEGG                                        |                                              | Benzoazinoid biosynthesis                                   | 3.90                   | 0.01    |                         |
|      | 4    | KEGG                                        |                                              | Fluorene degradation                                        | 2.46                   | 0.04    |                         |
|      | 5    | KEGG                                        |                                              | Fructose and mannose metabolism                             | 4.42                   | 0.01    |                         |
|      | 6    | KEGG                                        |                                              | Methylnaphthalene degradation                               | 3.33                   | 0.02    |                         |
|      | 7    | KEGG                                        |                                              | Naphthalene and anthracene degradation                      | 3.52                   | 0.01    |                         |
|      | 8    | KEGG                                        |                                              | Primary bile acid biosynthesis                              | 6.11                   | 0       | *                       |
|      | 9    | KEGG                                        |                                              | Sesquiterpenoid biosynthesis                                | 3.05                   | 0.01    |                         |
|      | 10   | KEGG                                        |                                              | Sphingolipid metabolism                                     | 2.86                   | 0.04    |                         |
|      | 11   | KOG                                         |                                              | Energy production and conversion                            | 6.15                   | 0.02    | *                       |
|      | 12   | KOG                                         |                                              | Secondary metabolites biosynthesis transport and catabolism | 7.61                   | 0.03    |                         |
|      | 13   | KOG                                         |                                              | Translation ribosomal structure and biogenesis              | 5.96                   | 0.02    |                         |
|      | 14   | KEGG                                        |                                              | Biosynthesis of plant hormones                              | 2.18                   | 0.05    |                         |
|      | 15   | CARD                                        |                                              | Antibiotic target replacement                               | 10.93                  | 0.015   | *                       |
| B    | 1    | MEROPS                                      | <i>CF</i>                                    | Peptidase                                                   | 5.67                   | 0.02    |                         |
|      | 2    | MEROPS                                      | <i>PD</i>                                    | Peptidase                                                   | 5.53                   | 0.01    |                         |
|      | 3    | MEROPS                                      | <i>SF</i>                                    | Peptidase                                                   | 4.37                   | 0.04    |                         |
|      | 4    | MEROPS                                      | <i>MT</i>                                    | Peptidase                                                   | 3.59                   | 0.05    |                         |
|      | 5    | MEROPS                                      | <i>CO</i>                                    | Peptidase                                                   | 3.07                   | 0.03    |                         |
| C    | 1    | CAZy                                        | <i>Glycoside Hydrolase Family 127</i>        | Degradation of complex sugars                               | 4.41                   | 0.01    |                         |
|      | 2    | CAZy                                        | <i>Glycoside Hydrolase Family 13 Subf 22</i> | Degradation of complex sugars                               | 2.22                   | 0.04    | *                       |
|      | 3    | CAZy                                        | <i>Glycoside Hydrolase Family 13 Subf 25</i> | Degradation of complex sugars                               | 3.22                   | 0.01    |                         |
|      | 4    | CAZy                                        | <i>Glycoside Hydrolase Family 133</i>        | Degradation of complex sugars                               | 2.07                   | 0.04    |                         |
|      | 5    | CAZy                                        | <i>Glycoside Hydrolase Family 30</i>         | Degradation of complex sugars                               | 4.37                   | 0.01    | *                       |
|      | 6    | CAZy                                        | <i>Glycoside Hydrolase Family 30 Subf 3</i>  | Degradation of complex sugars                               | 2.53                   | 0.03    | *                       |
|      | 7    | CAZy                                        | <i>Glycoside Hydrolase Family 30 Subf 7</i>  | Degradation of complex sugars                               | 3.35                   | 0.02    |                         |
|      | 8    | CAZy                                        | <i>Glycoside Hydrolase Family 31</i>         | Degradation of complex sugars                               | 2.77                   | 0.04    |                         |
|      | 9    | CAZy                                        | <i>Glycoside Hydrolase Family 43</i>         | Degradation of complex sugars                               | 2.50                   | 0.03    |                         |
|      | 10   | CAZy                                        | <i>Glycoside Hydrolase Family 5 Subf 24</i>  | Degradation of complex sugars                               | 2.86                   | 0.03    |                         |
|      | 11   | CAZy                                        | <i>Glycoside Hydrolase Family 53</i>         | Degradation of complex sugars                               | 2.02                   | 0.05    |                         |
|      | 12   | CAZy                                        | <i>Glycoside Hydrolase Family 67</i>         | Degradation of complex sugars                               | 3.74                   | 0.01    |                         |
|      | 13   | CAZy                                        | <i>Glycoside Hydrolase Family 71</i>         | Degradation of complex sugars                               | 2.98                   | 0.02    |                         |
|      | 14   | CAZy                                        | <i>Glycosyltransferase Family 15</i>         | Fungal polysaccharide synthesis                             | 4.54                   | 0.01    | *                       |
|      | 15   | CAZy                                        | <i>Glycosyltransferase Family 2</i>          | Fungal polysaccharide synthesis                             | 2.98                   | 0.01    |                         |
|      | 16   | CAZy                                        | <i>Glycosyltransferase Family 31</i>         | Fungal polysaccharide synthesis                             | 2.80                   | 0.04    |                         |
| 17   | CAZy | <i>Glycosyltransferase Family 39</i>        | Fungal polysaccharide synthesis              | 3.42                                                        | 0.01                   |         |                         |
| 18   | CAZy | <i>Glycosyltransferase Family 41</i>        | Fungal polysaccharide synthesis              | 2.18                                                        | 0.04                   |         |                         |
| 19   | CAZy | <i>Glycosyltransferase Family 59</i>        | Fungal polysaccharide synthesis              | 2.97                                                        | 0.01                   |         |                         |
| 20   | CAZy | <i>Polysaccharide Lyase Family 4 Subf 5</i> | Degradation of polysaccharides               | 2.13                                                        | 0.04                   |         |                         |
| 21   | CAZy | <i>Polysaccharide Lyase Family 7</i>        | Degradation of polysaccharides               | 2.82                                                        | 0.01                   |         |                         |

Supplementary Figure 8. Frequencies of genes selected from Random Forest (RF) analyses of genomes matching dominant Ascomycota phylotypes (n=13) and genomes representing phylotypes assigned to the non-dominant Ascomycota (n=11). The asterisk highlights those genes that were significantly different in relative frequency (average  $\pm$  SE), calculated by one-way anova,  $p < 0.05$ .

**A**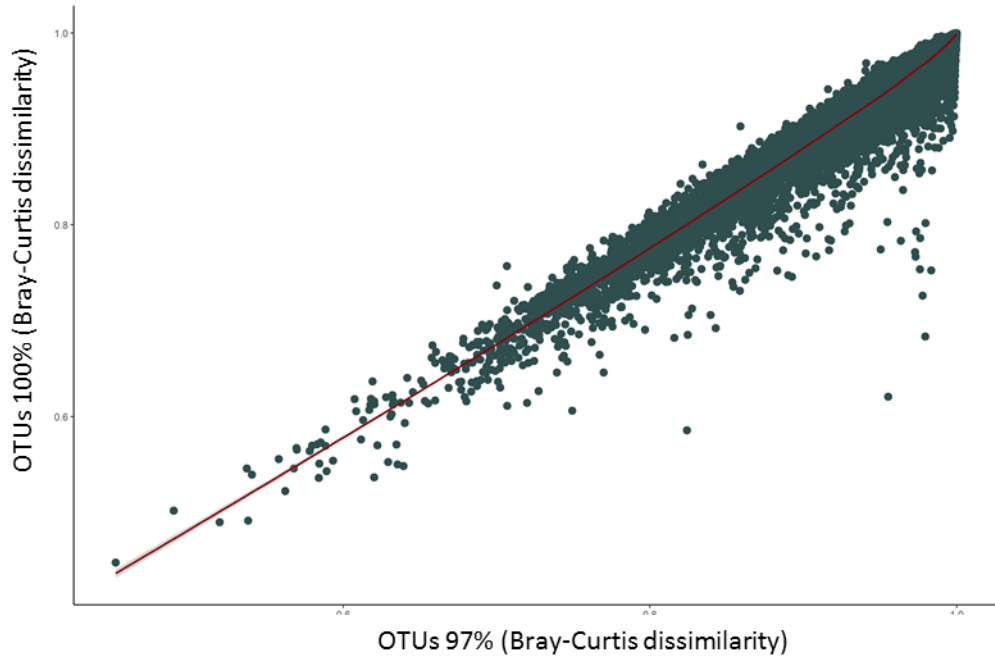**B**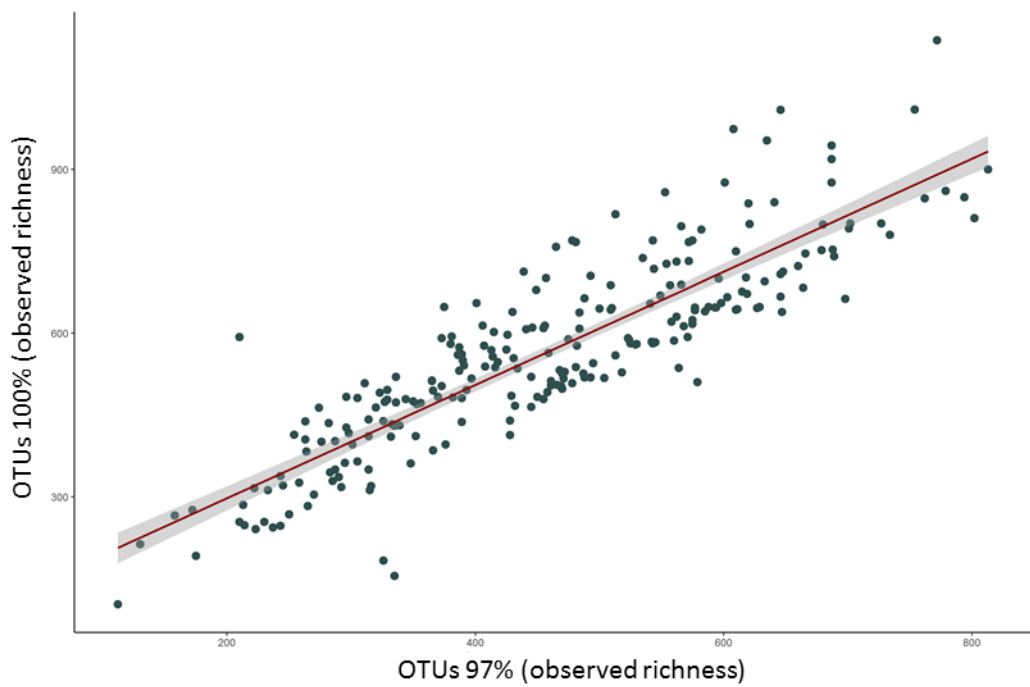

Supplementary Figure 9. Comparison of (A)  $\beta$  (Bray-Curtis dissimilarity index) and (B) observed  $\alpha$  diversity for phylotypes clustered at the 97% and 100% similarity cut-off. Shaded areas represent confidence intervals (95%)

## Supplementary Note 1

We validated the results of the dominant phylotype identification using data from a recent biogeography study that surveyed the fungal community from soils worldwide <sup>2</sup>. The two datasets are substantially different in terms of methodology, including sampling protocol (top 10 cm of soil here vs. 5 cm), primers used (FITS7/ITS4 here vs. a suite of degenerated ITS3/ITS4), sequencing platform (Illumina MiSeq here vs. pyrosequencing), sequencing depth (12M reads here vs. 2.5M reads), and read lengths (180 bp here vs. 99-409 bp). Additionally, the two datasets differed in the type of biomes surveyed, with the validation dataset having a poor representation of drylands (<1% of the 350 surveyed sites). Therefore, the results of these comparisons should be considered carefully. We used the same approach described in the main text to identify the dominant taxa across the 365 sites of the validation dataset (i.e. taxa that were occurring in at least one third of the samples from a given biome, and were dominant in at least half of the sampled biomes). In the dataset used for validation, we identified 22 dominant phylotypes (vs. the 83 dominant OTUs obtained in our dataset). 45% (n = 10) of the dominant phylotypes from the validation dataset had a matching species hypothesis with the dominant OTUs identified in our dataset, indicating that those phylotypes had at least 97% similarity to each other. Moreover, we found comparable results between the two datasets at coarse taxonomic scales, with the majority of the dominant phylotypes being ascribed to phylum Ascomycota and, to a minor extent, Basidiomycota and Zygomycota sensu lato. The strongest incongruence was related to Mortierellales, whose members occurred in the dominant community of the validation dataset, but not in our dataset. While members of Mortierellales, including *Mortierella* spp., have been previously retrieved in studies that used the same primer pairs and technologies <sup>3-5</sup>, we cannot exclude that the primers used in our survey are not biased against this fungal lineage. Hence, given the methodological differences between the two studies, the discrepancies in number and identity of dominant phylotypes can be ascribed to the differing sequencing depth and overall dissimilarities in sampling and sequencing strategies.

## Supplementary Note 2

We also conducted three cross-validations for our predictive maps of the dominant soil fungi distribution. First, we evaluated the correlation between predicted (maps) and observed values for the standardised abundance of dominant taxa of fungi. The two datasets were always positively and significantly correlated using our own global database (Fig. 2;  $r = 0.32-0.61$ ;  $P < 0.001$ ). Subsequently, we re-built the predictive maps using 66% of the data within our database (randomly selected) and the left 33% of data. We found positive significant Spearman correlations between predicted (maps) and observed data (33% of data;  $n = 78$ ) for modules #0 (forest;  $r = 0.66$ ;  $P < 0.001$ ;  $n = 78$ ), #1 (drylands;  $r = 0.48$ ;  $P < 0.001$ ;  $n = 78$ ) and #2 (mesic;  $r = 0.48$ ;  $P < 0.001$ ;  $n = 78$ ). Also, the original maps and the new maps were positively correlated, as follows: modules #0 (forest;  $r = 0.46$ ;  $P < 0.001$ ;  $n = 225530$ ), #1 (dry;  $r = 0.51$ ;  $P < 0.001$ ;  $n = 225530$ ) and #2 (mesic;  $r = 0.62$ ;  $P < 0.001$ ;  $n = 225530$ ). Finally, we used the data from the Biomes of Australian Soil Environments (BASE) soil microbial diversity database (Bissett et al. 2016). BASE is a continental-scale dataset for soil microbes covering a wide variety of bioregions, vegetation and land-use types, allowing us to further cross-validate our results using a large-scale, independent database. First, we extracted the phylotypes from BASE matching (sequence similarity  $>97\%$ ) the top dominant taxa found in our global dataset, resulting in 234 phylotypes accounting for, on average, 9.7% of the total reads. We then focused on the two ecological clusters harbouring the largest number of phylotypes matching our dominant taxa (associated with mesic and dryland systems) for these analyses. Predicted (our global maps) and observed values for the standardised abundance of dominant taxa of fungi were positively and significantly correlated ( $r = 0.22-0.33$ ;  $P < 0.001$ ;  $\rho = 0.32$ ;  $P < 0.001$ ), supporting the validity of our global maps.

### Supplementary Table 1

Extended results regarding the mapping of ecological clusters, including correlation coefficients and *p* values for each cluster (module) obtained by Random Forest analyses and semi-partial correlations.

| ID            | M0            | M0            | M1             | M1            | M2            | M2            |
|---------------|---------------|---------------|----------------|---------------|---------------|---------------|
| Parameters    | Rho           | P-value       | Rho            | P-value       | Rho           | P-value       |
| Aridity_Index | -0.0819       | 0.2240        | <b>-0.1502</b> | <b>0.0252</b> | <b>0.3127</b> | <b>0.0000</b> |
| Forest        | <b>0.2282</b> | <b>0.0006</b> | -0.0034        | 0.9600        | 0.0969        | 0.1502        |
| Grassland     | <b>0.1619</b> | <b>0.0157</b> | 0.0553         | 0.4121        | 0.0969        | 0.1502        |
| MDR           | 0.0538        | 0.4252        | 0.0154         | 0.8196        | <b>0.1529</b> | <b>0.0227</b> |
| MAXT          | -0.0290       | 0.6677        | -0.0339        | 0.6154        | -0.0844       | 0.2103        |
| MINT          | 0.0103        | 0.8790        | -0.0181        | 0.7890        | 0.0158        | 0.8144        |
| UV_Light      | <b>0.1596</b> | <b>0.0173</b> | 0.0674         | 0.3178        | 0.0495        | 0.4635        |
| Soil_P        | 0.0376        | 0.5775        | 0.0416         | 0.5374        | 0.1092        | 0.1046        |
| PSEA          | -0.0731       | 0.2779        | 0.0295         | 0.6623        | 0.0902        | 0.1806        |
| pH            | 0.1042        | 0.1215        | 0.1060         | 0.1152        | -0.0564       | 0.4032        |
| Clay_silt     | 0.0611        | 0.3651        | 0.0377         | 0.5766        | -0.0443       | 0.5114        |
| Soil_C        | -0.0413       | 0.5407        | -0.0698        | 0.3004        | -0.0444       | 0.5108        |
| CN            | 0.0071        | 0.9156        | -0.0285        | 0.6729        | 0.0089        | 0.8952        |
| NPP2003_2015  | 0.0190        | 0.7779        | -0.0590        | 0.3813        | -0.0065       | 0.9238        |

## Supplementary Table 2

List of identified dominant fungal phylotypes from soils across the globe from OTUs clustered at the 97% threshold. This list contains information on the taxonomic identity of each phylotype and the most closely related Species Hypothesis.

| OTUId    | Phylum        | Class                   | Order                        | Family                         | Genus                                                            | Species Hypothesis |
|----------|---------------|-------------------------|------------------------------|--------------------------------|------------------------------------------------------------------|--------------------|
| OTU1018  | Ascomycota    | Ascomycota_unidentified | Ascomycota_unidentified_1    | Ascomycota_unidentified_1      | Ascomycota_unidentifie<br>d_1_1                                  | SH189849.06FU      |
| OTU105   | Ascomycota    | Leotiomycetes           | Helotiales                   | Incertae_sedis_2               | Tetracladium                                                     | SH216421.06FU      |
| OTU11    | Ascomycota    | Sordariomycetes         | Sordariales                  | Chaetomiaceae                  | Humicola                                                         | SH234919.06FU      |
| OTU1116  | Ascomycota    | Lecanoromycetes         | Lecanorales                  | Parmeliaceae                   |                                                                  | SH206620.06FU      |
| OTU113   | Ascomycota    | Dothideomycetes         | Pleosporales                 | Pleosporales_unidentified      | Pleosporales_unidentifie<br>d_1                                  | SH196178.06FU      |
| OTU11342 | Ascomycota    | Ascomycota_unidentified | Ascomycota_unidentified_1    | Ascomycota_unidentified_1      | Ascomycota_unidentifie<br>d_1_1                                  | SH233666.06FU      |
| OTU126   | Ascomycota    | Sordariomycetes         | Hypocreales                  | Hypocreales_unidentified       | Hypocreales_unidentifie<br>d_1                                   | SH224303.06FU      |
| OTU129   | Ascomycota    | Sordariomycetes         | Sordariales                  | Chaetomiaceae                  |                                                                  | SH234922.06FU      |
| OTU13    | Ascomycota    | Ascomycota_unidentified | Ascomycota_unidentified_1    | Ascomycota_unidentified_1      | Ascomycota_unidentifie<br>d_1_1                                  | SH219457.06FU      |
| OTU133   | Ascomycota    | Eurotiomycetes          | Chaetothyriales              | Herpotrichiellaceae            |                                                                  | SH209065.06FU      |
| OTU13559 | Ascomycota    | Sordariomycetes         | Hypocreales                  | Nectriaceae                    | Nectriaceae_unidentified<br>Herpotrichiellaceae_unid<br>entified | SH217306.06FU      |
| OTU15    | Ascomycota    | Eurotiomycetes          | Chaetothyriales              | Herpotrichiellaceae            |                                                                  | SH209738.06FU      |
| OTU155   | Ascomycota    | Dothideomycetes         | Pleosporales                 | Sporormiaceae                  | Sporormiaceae_unidenti<br>fied                                   | SH190469.06FU      |
| OTU16    | Basidiomycota | Tremellomycetes         | Tremellales                  | Incertae_sedis_12              | Cryptococcus_1<br>Pleosporales_unidentifie<br>d_1                | SH197001.06FU      |
| OTU168   | Ascomycota    | Dothideomycetes         | Pleosporales                 | Pleosporales_unidentified      |                                                                  | SH223798.06FU      |
| OTU170   | Ascomycota    | Sordariomycetes         | Hypocreales                  | Ophiocordycipitaceae           | Purpureocillium                                                  | SH224001.06FU      |
| OTU186   | Ascomycota    | Dothideomycetes         | Pleosporales                 | Sporormiaceae                  | Preussia                                                         | SH190474.06FU      |
| OTU2     | Ascomycota    | Sordariomycetes         | Hypocreales                  | Nectriaceae                    | Fusarium                                                         | SH217297.06FU      |
| OTU20    | Ascomycota    | Sordariomycetes         | Hypocreales                  | Hypocreaceae                   | Trichoderma                                                      | SH240600.06FU      |
| OTU2009  | Ascomycota    | Dothideomycetes         | Pleosporales                 | Pleosporaceae                  | Alternaria                                                       | SH224792.06FU      |
| OTU21    | Ascomycota    | Dothideomycetes         | Incertae_sedis_8             | Pseudeurotiaceae               | Pseudogymnoascus                                                 | SH236509.06FU      |
| OTU2182  | Ascomycota    | Eurotiomycetes          | Eurotiales                   | Trichocomaceae                 | Penicillium<br>Sordariaceae_unidentifie<br>d                     | SH193628.06FU      |
| OTU23    | Ascomycota    | Sordariomycetes         | Sordariales                  | Sordariaceae                   |                                                                  | SH213056.06FU      |
| OTU2322  | Ascomycota    | Ascomycota_unidentified | Ascomycota_unidentified_1    | Ascomycota_unidentified_1      |                                                                  | SH234925.06FU      |
| OTU242   | Ascomycota    | Dothideomycetes         | Pleosporales                 | Pleosporaceae                  | Bipolaris                                                        | SH224794.06FU      |
| OTU246   | Ascomycota    | Dothideomycetes         | Dothideales                  | Dothioraceae                   | Aureobasidium                                                    | SH206629.06FU      |
| OTU259   | Ascomycota    | Sordariomycetes         | Sordariales                  | Chaetomiaceae                  |                                                                  | SH234919.06FU      |
| OTU261   | Ascomycota    | Sordariomycetes         | Hypocreales                  | Hypocreales_unidentified       | Hypocreales_unidentifie<br>d_1                                   | SH217356.06FU      |
| OTU27    | Ascomycota    | Ascomycota_unidentified | Ascomycota_unidentified_1    | Ascomycota_unidentified_1      |                                                                  | SH236035.06FU      |
| OTU276   | Ascomycota    | Eurotiomycetes          | Chaetothyriales              | Chaetothyriales_unidentified   | Chaetothyriales_unidenti<br>fied_1                               | SH209756.06FU      |
| OTU280   | Ascomycota    | Eurotiomycetes          | Chaetothyriales              | Herpotrichiellaceae            |                                                                  | SH225357.06FU      |
| OTU288   | Ascomycota    | Sordariomycetes         | Coniochaetales               | Coniochaetaceae                | Coniochaeta                                                      | SH226462.06FU      |
| OTU296   | Ascomycota    | Dothideomycetes         | Pleosporales                 | Pleosporales_unidentified      |                                                                  | SH240086.06FU      |
| OTU3     | Ascomycota    | Ascomycota_unidentified | Ascomycota_unidentified_1    | Ascomycota_unidentified_1      | Ascomycota_unidentifie<br>d_1_1                                  | SH197541.06FU      |
| OTU30    | Ascomycota    | Sordariomycetes         | Sordariomycetes_unidentified | Sordariomycetes_unidentified_1 | Sordariomycetes_uniden<br>tified_1                               | SH235275.06FU      |



|         |               |                         |                           |                              |                                |               |
|---------|---------------|-------------------------|---------------------------|------------------------------|--------------------------------|---------------|
| OTU301  | Ascomycota    | Dothideomycetes         | Pleosporales              | Pleosporales_unidentified    | Pleosporales_unidentified_1    | SH217121.06FU |
| OTU330  | Ascomycota    | Eurotiomycetes          | Chaetothyriales           | Herpotrichiellaceae          | Capronia                       | SH209735.06FU |
| OTU340  | Ascomycota    | Sordariomycetes         | Hypocreales               | Bionectriaceae               | Clonostachys                   | SH236629.06FU |
| OTU355  | Basidiomycota | Tremellomycetes         | Tremellales               | Incertae_sedis_12            |                                | SH197113.06FU |
| OTU356  | Ascomycota    | Sordariomycetes         | Sordariales               | Lasiosphaeriaceae            | Podospora                      | SH222042.06FU |
| OTU4    | Ascomycota    | Dothideomycetes         | Pleosporales              | Pleosporaceae                | Pleosporaceae_unidentified     | SH224797.06FU |
| OTU40   | Ascomycota    | Eurotiomycetes          | Chaetothyriales           | Chaetothyriales_unidentified | Chaetothyriales_unidentified_1 | SH219002.06FU |
| OTU435  | Ascomycota    | Dothideomycetes         | Pleosporales              | Pleospores_unidentified      | Pleospores_unidentified_1      | SH237285.06FU |
| OTU44   | Ascomycota    | Leotiomycetes           | Helotiales                | Vibrissaceae                 | Myxocephala                    | SH235575.06FU |
| OTU45   | Ascomycota    | Sordariomycetes         | Coniochaetales            | Coniochaetaceae              | Lecythophora                   | SH235858.06FU |
| OTU537  | Ascomycota    | Dothideomycetes         | Pleosporales              | Montagnulaceae               | Paraconiothyrium               | SH224124.06FU |
| OTU541  | Ascomycota    | Sordariomycetes         | Hypocreales               | Cordycipitaceae              | Lecanicillium                  | SH196289.06FU |
| OTU577  | Ascomycota    | Eurotiomycetes          | Eurotiales                | Trichocomaceae               | Penicillium                    | SH231334.06FU |
| OTU58   | Ascomycota    | Eurotiomycetes          | Chaetothyriales           | Herpotrichiellaceae          | Exophiala                      | SH230191.06FU |
| OTU59   | Ascomycota    | Leotiomycetes           | Incertae_sedis            | Incertae_sedis_1             | Leohumicola                    | SH209174.06FU |
| OTU6    | Ascomycota    | Dothideomycetes         | Pleosporales              | Pleosporaceae                | Alternaria                     | SH224789.06FU |
| OTU61   | Ascomycota    | Sordariomycetes         | Sordariales               | Chaetomiaceae                | Chaetomiaceae_unidentified     | SH234920.06FU |
| OTU64   | Ascomycota    | Eurotiomycetes          | Eurotiales                | Trichocomaceae               | Talaromyces                    | SH225847.06FU |
| OTU67   | Ascomycota    | Sordariomycetes         | Sordariales               | Chaetomiaceae                |                                | SH234934.06FU |
| OTU6748 | Ascomycota    | Dothideomycetes         | Pleosporales              | Incertae_sedis_13            |                                | SH202145.06FU |
| OTU7    | Ascomycota    | Ascomycota_unidentified | Ascomycota_unidentified_1 | Ascomycota_unidentified_1    | Ascomycota_unidentified_1_1    | SH217298.06FU |
| OTU73   | Ascomycota    | Sordariomycetes         | Hypocreales               | Hypocreaceae                 | Trichoderma                    | SH222750.06FU |
| OTU747  | Ascomycota    | Eurotiomycetes          | Chaetothyriales           | Herpotrichiellaceae          | Cladophialophora               | SH225359.06FU |
| OTU7611 | Ascomycota    | Sordariomycetes         | Sordariales               | Lasiosphaeriaceae            | Podospora                      | SH222041.06FU |
| OTU8    | Ascomycota    | Ascomycota_unidentified | Ascomycota_unidentified_1 | Ascomycota_unidentified_1    |                                | SH241083.06FU |
| OTU807  | Ascomycota    | Dothideomycetes         | Pleosporales              | Pleosporaceae                |                                | SH197545.06FU |
| OTU82   | Ascomycota    | Ascomycota_unidentified | Ascomycota_unidentified_1 | Ascomycota_unidentified_1    | Ascomycota_unidentified_1_1    | SH195163.06FU |
| OTU9    | Ascomycota    | Dothideomycetes         | Capnodiales               | Davidiellaceae               | Davidiella                     | SH196750.06FU |

### Supplementary References:

1. Oksanen, A. J. *et al.* Package ‘vegan’. (2013).
2. Tedersoo, L. *et al.* Global diversity and geography of soil fungi. *Science* (80-. ). 346, (2014).
3. Nallanchakravarthula, S., Mahmood, S., Alström, S. & Finlay, R. D. Influence of Soil Type, Cultivar and *Verticillium dahliae* on the Structure of the Root and Rhizosphere Soil Fungal Microbiome of Strawberry. *PLoS One* 9, e111455 (2014).
4. Gkarmiri, K. *et al.* Identifying the Active Microbiome Associated with Roots and Rhizosphere Soil of Oilseed Rape. *Appl. Environ. Microbiol.* 83, AEM.01938-17 (2017).
5. Hamonts, K. *et al.* Field study reveals core plant microbiota and relative importance of their drivers. *Environ. Microbiol.* 20, 124–140 (2018).
6. Nei, M. & Kumar, S. *Molecular evolution and phylogenetics.* (2000).
7. Kumar, S., Stecher, G. & Tamura, K. MEGA7: Molecular Evolutionary Genetics Analysis Version 7.0 for Bigger Datasets. *Mol. Biol. Evol.* 33, 1870–1874 (2016).
8. Letunic, I. & Bork, P. Interactive tree of life (iTOL) v3: an online tool for the display and annotation of phylogenetic and other trees. *Nucleic Acids Res.* 44, W242–W245 (2016).
